# Supplementary material
Source: PubMed Central journal article supplement (PMC7856155)
Supplement: ejhpharm-2018-001806supp001.pdf [file ejhpharm-2018-001806supp001.pdf]

**Supplemental Table.** Baseline demographic characteristics.

| DEMOGRAPHIC CHARACTERISTICS |              |
|-----------------------------|--------------|
| Patients, n (%)             | 31 (100)     |
| Men                         | 23 (74)      |
| Women                       | 8 (26)       |
| Mean age (range), years     | 69 (51 – 85) |
| Smoking history, n (%)      |              |
| Yes                         | 18 (59)      |
| No                          | 13 (41)      |
| Main Comorbidities, n (%)   |              |
| Arterial Hypertension       | 9 (29)       |
| Dyslipidemia                | 12 (39)      |
| Diabetes Mellitus           | 12 (39)      |
| Rheumatic Disease           | 6 (19)       |
| Ischemic Heart Disease      | 5 (16)       |
