# Supplementary material
Source: PubMed Central journal article supplement (PMC7856155)
Supplement: ejhpharm-2018-001806supp002.pdf [file ejhpharm-2018-001806supp002.pdf]

**ABSTRACT**

**Objetivos:** Determinar la efectividad a largo plazo de pirfenidona en el tratamiento de la fibrosis pulmonar idiopática (FPI) y establecer su perfil de efectos adversos.

**Métodos:** Estudio observacional retrospectivo en pacientes con FPI que iniciaron tratamiento con pirfenidona entre 2011 y 2016. Se recogieron variables demográficas (edad, sexo); fecha de inicio y fin de tratamiento; motivo de la retirada; medidas de función pulmonar (capacidad vital forzada [FVC], capacidad de difusión pulmonar de monóxido de carbono [DLCO], y la prueba de 6 minutos marcha [6MWT]) al inicio de tratamiento (basal) y al año, los dos y los tres años de seguimiento; la adherencia al tratamiento con pirfenidona; el registro de efectos adversos y la mortalidad.

**Resultados:** 31 pacientes tratados con pirfenidona fueron incluidos; la edad media ( $\pm$  desviación estándar) fue de 69 ( $\pm$  8) años, 74% eran hombres, and 59% tenían historia de tabaquismo. Los valores medios basales fueron: para FVC,  $2.43 \pm 0.66$  L (61.8% $\pm$ 12.1%); DLCO, 46.1% $\pm$ 19.4%; y 6MWT, 334 $\pm$ 125 m. La mediana de duración de tratamiento fue de 14 $\pm$ 13 meses, y el tratamiento se interrumpió en el 58% de los pacientes. Los efectos adversos más frecuentemente observados fueron los problemas gastrointestinales y la fotosensibilidad. Veinte (65%) pacientes fueron evaluados al año, la FVC media fue  $2.41 \pm 0.86$  L (64.7% $\pm$ 20.3%); DLCO, 50.8% $\pm$ 26.8%; y 6MWT, 341 $\pm$ 139 m. A los dos años de seguimiento, 11 pacientes (36%) que seguían tomando pirfenidona fueron evaluados. La FVC media fue  $2.34 \pm 0.79$  L (66.2% $\pm$ 14.7%); DLCO, 50.0% $\pm$ 28.3%; y 6MWT, 265 $\pm$ 121 m. A los tres años, cinco pacientes seguían tomando el tratamiento. La FVC fue  $2.71 \pm 0.84$  L (71.0% $\pm$ 24.7%); DLCO, 52.6% $\pm$ 26.7%; y 6MWT, 286 $\pm$ 139 m. 19% de los pacientes fueron no adherentes al tratamiento.

**Conclusiones:** Pirfenidona parece ser efectiva para el control a largo plazo de la FPO a pesar de la variabilidad sustancial entre los pacientes. Los efectos adversos más frecuentes fueron los digestivos y los cutáneos, siendo la causa, en algunos casos, de una reducción de dosis o incluso una interrupción del tratamiento.
